# Supplementary material for: Nanosonosensitizers for Highly Efficient Sonodynamic Cancer Theranostics
Source: PubMed Central journal article supplement — Theranostics. 2018 Nov 29;8(22):6178–94. doi: 10.7150/thno.29569 (PMC6299698; doi:10.7150/thno.29569), 2018-11-29
Supplement: thnov08p6178s1.pdf [file thnov08p6178s1.pdf]

## Supporting Information

# **Nanosonosensitizers for Highly Efficient Sonodynamic Cancer Theranostics**

Ju Huang<sup>1</sup>, Fengqiu Liu<sup>1</sup>, Xiaoxia Han<sup>1</sup>, Liang Zhang<sup>1</sup>, Zhongqian Hu<sup>2</sup>, Qinqin Jiang<sup>1</sup>, Zhigang Wang<sup>1</sup>, Haitao Ran<sup>1</sup>, Dong Wang<sup>3</sup>, Pan Li<sup>1</sup>✉

<sup>1</sup>Institute of Ultrasound Imaging, The Second Affiliated Hospital of Chongqing Medical University, Chongqing 400010, P. R. China;

<sup>2</sup>Department of Ultrasound, Zhongda Hospital, Southeast University, Nanjing 210009, P. R. China;

<sup>3</sup>Department of Ultrasound, The First Affiliated Hospital of Chongqing Medical University Chongqing 400010, P. R. China.

✉Corresponding author: D. Li ([cqlipan@163.com](mailto:cqlipan@163.com))

## Supplementary Figures

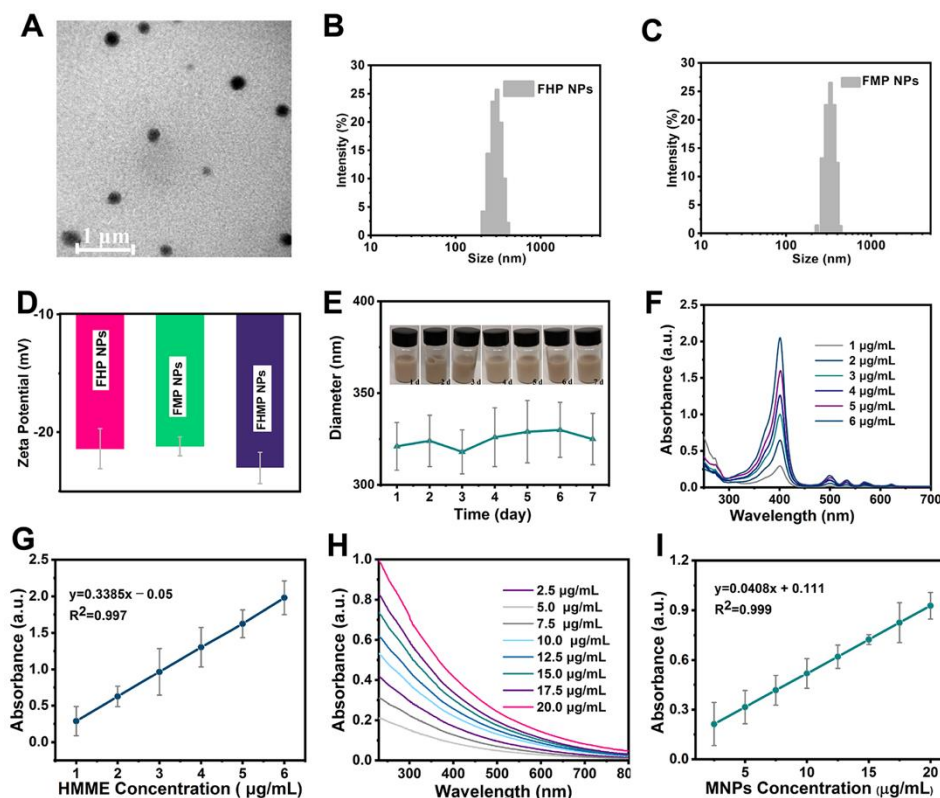

**Figure S1.** (A) The TEM of FHMP NPs. Size distribution of (B) FHP NPs and (C) FMP NPs. (D) Zeta potential of FHP NPs, FMP NPs and FHMP NPs (E) The changes of size distribution for 7 days' period. Inset: digital photos of the FHMP NPs dispersed in FBS (25 mg/mL). (F) The spectra of HMME at different concentrations (1, 2, 3, 4, 5 and 6 μg/mL). (G) The linear relationship between HMME and concentration. (H) The spectra of MNPs reacted with 0.1 M NaOH at various concentrations (2.5, 5, 7.5, 10, 12.5, 15, 17.5 and 20 μg/mL). (I) The linear relationship between MNPs and concentration.

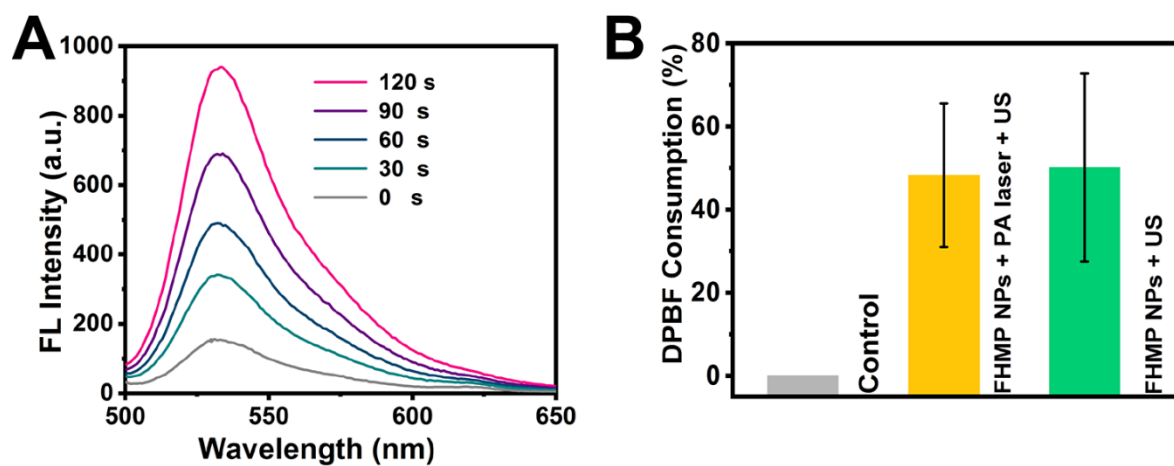

**Figure S2.** (A) The ROS production of FHMP NPs after different irradiation time (0 s, 30 s, 60 s, 90 s and 120 s) detected by SOSG. (B) Relative DBPF consumption of FHMP NPs under the treatment of laser or US irradiation ( $n = 3$ ,  $*p < 0.05$ ).

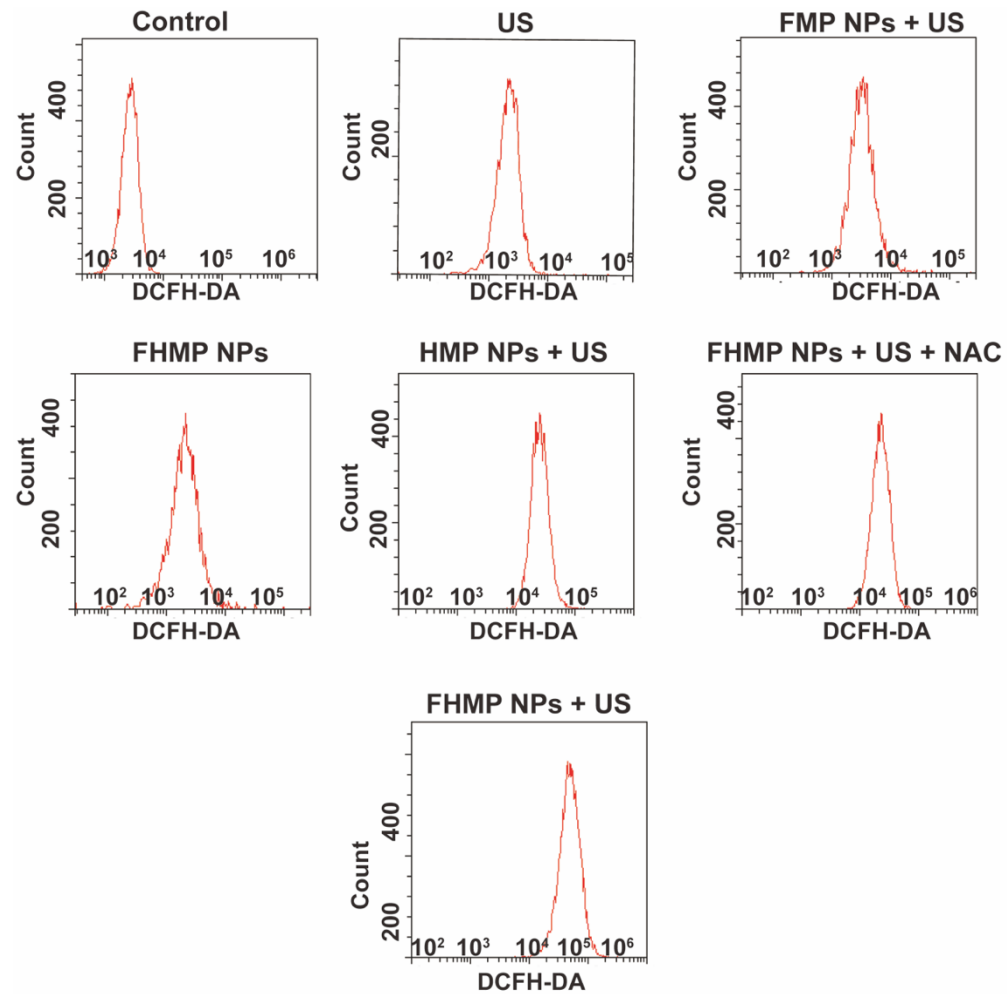

**Figure S3.** The fluorescence intensity of MDA-MB-231 cells after incubation with DCFH-DA for different treatments (Control, US, FMP NPs+US, FHMP NPs, HMP NPs +US, FHMP NPs+US+NAC and FHMP NPs+US) detect by flow cytometry.

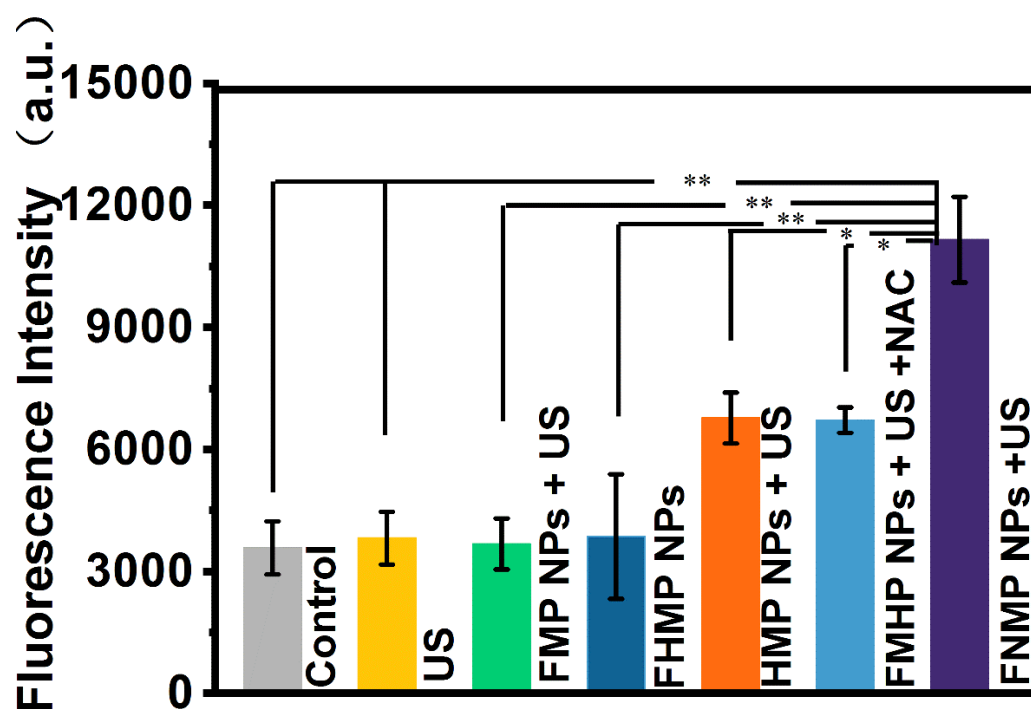

**Figure S4.** Flow cytometry fluorescence intensity of MDA-MB-231 cells after incubation with DCFH-DA for different treatments (Control, US, FMP NPs+US, FHMP NPs, HMP NPs +US, FHMP NPs+US+NAC and FNMP NPs+US) (n = 3, \*\*p < 0.01).

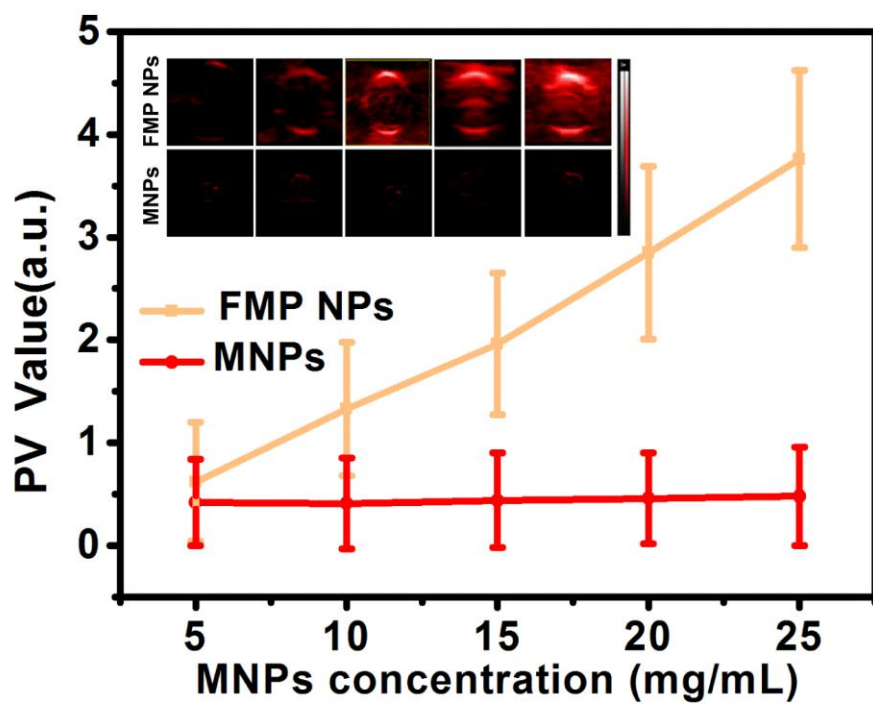

**Figure S5.** *In vitro* PA values of FMP NPs with different concentrations (5, 10, 15, 20, and 25 mg/mL). Inset: PA images of FHMP NPs dispersed in aqueous solution and MNPs dispersed in 0.1 M NaOH solution.

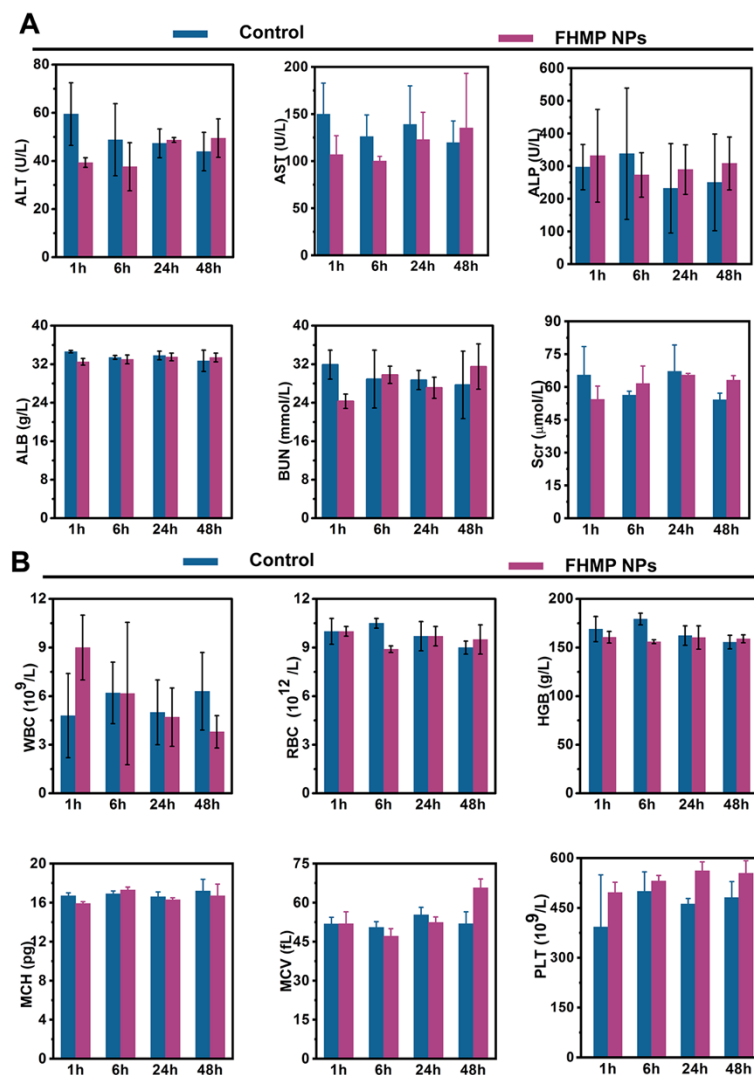

**Figure S6.** (A) Haematological data of the mice intravenously injected with FHMP NPs or saline (as control) at 1, 6, 24 and 48 h post-injection. (B) Blood biochemical analysis of the mice intravenously injected with FHMP NPs or saline (as control) at 1, 6, 24 and 48 h post-injection.
